# Supplementary material for: Chemokine Receptors, CXCR1 and CXCR2, Differentially Regulate Exosome Release in Hepatocytes
Source: PLoS One. 2016 Aug 23;11(8):e0161443. doi: 10.1371/journal.pone.0161443 (PMC4995008; doi:10.1371/journal.pone.0161443)
Supplement: S1 Table — Datasets for individual figures are in individual tabs of the spreadsheet. (XLSX) [file pone.0161443.s002.xlsx]

## Sheet: Fig1A
Comparing exosome particles in WT vs CXCR1KO
	WT-Sham	WT-24H	WT-96H	CXCR1KO-Sham	CXCR1KO-24H	CXCR1KO-96H
	410750000	400750000	343250000	2.31619e+08	3.78347e+08	2.48816e+08
	330750000	335750000	288250000	1.96126e+08	3.01872e+08	1.76367e+08
	223250000	540750000	570750000	1.10499e+08	3.20979e+08	2.81932e+08
	250750000	535750000	248250000	1.36965e+08	4.53342e+08	2.54798e+08
	393250000	398250000	233250000		2.71343e+08
	3.29597e+08	5.31382e+08	283250000
	3.12339e+08	4.9368e+08	343250000
		7.85737e+08
		5.00848e+08
		5.13327e+08
		4.55447e+08
mean	3.21526e+08	4.99243e+08	3.30036e+08	1.68802e+08	3.45177e+08	2.40478e+08
SD	6.32538e+07	1.10761e+08	1.05752e+08	4.77109e+07	6.43617e+07	3.90619e+07
SEM	2.39077e+07	3.33957e+07	3.99704e+07	2.38555e+07	2.87834e+07	1.95309e+07

## Sheet: Fig1B
Comparing exosome particles in WT vs CXCR2KO
	WT-Sham	WT-24H	WT-96H	CXCR2KO-Sham	CXCR2KO-24H	CXCR2KO-96H
	9.88061e+07	4.62881e+08	8.43893e+07	2.64032e+08	5.54926e+08	3.17681e+08
	1.93703e+08	4.33894e+08	1.29978e+08	1.99617e+08	6.33632e+08	2.01334e+08
	1.44568e+08	4.20251e+08	1.55746e+08	2.58733e+08	4.7657e+08	1.92683e+08
	1.73953e+08	4.55931e+08	1.89442e+08	2.54398e+08	5.6647e+08	3.62877e+08
			1.56406e+08		6.10195e+08	4.32582e+08
mean	1.52757e+08	4.43239e+08	1.43192e+08	2.44195e+08	5.68359e+08	3.01431e+08
SD	3.57196e+07	1.7049e+07	3.49388e+07	2.59622e+07	5.40743e+07	9.28285e+07
SEM	1.78598e+07	8.52449e+06	1.56251e+07	1.29811e+07	2.41828e+07	4.15142e+07

## Sheet: Fig1E
Comparing ALT in WT vs CXCR1KO
	WT-Sham	WT-24H	WT-96H	CXCR1KO-Sham	CXCR1KO-24H	CXCR1KO-96H
	5	2599	48	8	2901	65
	7	3455	31	6	3236	92
	9	2312	35	7	2422	23
		2599	24		1697	23
mean	7	2741.25	34.5	7	2564	50.75
SD	1.63299	428.417	8.73212	0.816497	578.145	29.346
SEM	0.942809	214.209	4.36606	0.471405	289.072	14.673

## Sheet: Fig1F
Comparing exosome particles in WT vs CXCR2KO
	WT-Sham	WT-24H	WT-96H	CXCR2KO-Sham	CXCR2KO-24H	CXCR2KO-96H
	9	3478	40	8	1425	50
	7	1943	49	9	1513	50
	7	3915	33	5	2243	38
		3961	59		2123	21
mean	7.66667	3324.25	45.25	7.33333	1826	39.75
SD	0.942809	819.44	9.75641	1.69967	360.856	11.8822
SEM	0.544331	409.72	4.8782	0.981307	180.428	5.94112

## Sheet: Fig2A
Comparing exosome particles in WT vs CXCR1KO
	WT-HEP	WT-KC	WT-SEC	CXCR1-HEP	CXCR1-KC	CXCR1-SEC
	6.72061e+08	4.85146e+08	1.31179e+08	2.87679e+08	1.26193e+08	1.43817e+08
	8.05841e+08	8.20862e+08	1.13945e+08	5.11836e+08	1.66682e+08	9.21152e+07
	6.31263e+08	2.57315e+08	1.56455e+08	2.01246e+08	1.97296e+08
	4.54549e+08	3.38277e+08		3.30613e+08	1.08509e+09
	4.42276e+08				6.45637e+08
					7.40441e+08
mean	6.01198e+08	4.754e+08	1.3386e+08	3.32843e+08	4.93557e+08	1.17966e+08
SD	1.37526e+08	2.15524e+08	1.7458e+07	1.13359e+08	3.56737e+08	2.58509e+07
SEM	6.15033e+07	1.07762e+08	1.00794e+07	5.66795e+07	1.45637e+08	1.82794e+07

## Sheet: Fig2B
Comparing exosome particles in WT vs CXCR2KO
	WT-HEP	WT-KC	WT-SEC	CXCR2-HEP	CXCR2-KC	CXCR2-SEC
	3.14047e+08	1.65654e+08	1.23136e+08	1.35743e+09	2.94439e+08	2.28838e+08
	5.23411e+08	147156003	1.03605e+08	1.71443e+09	1.52171e+08	2.50668e+08
	4.76247e+08	1.57317e+08	1.12796e+08	1.42632e+09	1.36809e+08	2.02413e+08
	3.85369e+08	662622893		8.78919e+08	4.54436e+08
	2.79536e+08			9.55331e+08
				1.04427e+09
mean	3.95722e+08	2.83188e+08	1.13179e+08	1.22945e+09	2.59464e+08	2.27306e+08
SD	9.28073e+07	2.19165e+08	7.97843e+06	2.95142e+08	1.28251e+08	1.97298e+07
SEM	4.15047e+07	1.09583e+08	4.60635e+06	1.20491e+08	6.41255e+07	1.1391e+07

## Sheet: Fig2C
Comparing exosome particles after MIP-2 treatment
	MIP-2 0	MIP-2 100	MIP-2 5000
	542446751	498837707	392377358
	448976499	418045374	583267388
	640776767	662766223	784536305
	361962911	500984789	1049922203
	554266555	495026764	296612558
	465455505	312103237	327674753
	582913713	67591515	330718171
	391527358	157843974
	655281948	650372670
	401564747	335431786
	364674009	454962043
	801599790
	269583420
mean	4.98541e+08	4.13997e+08	5.37873e+08
SD	1.42018e+08	1.76571e+08	2.64999e+08
SEM	3.93887e+07	5.32382e+07	1.0016e+08

## Sheet: Fig3B
Comparing ceramide in WT vs CXCR1KO
	WT	CXCR1KO
	6.9	7.5
	3.5	7.4
	7.8	3.8
	3.8	5.2
mean	5.5	5.975
SD	1.88016	1.55624
SEM	0.94008	0.778119

## Sheet: Fig3C
Comparing Nsm in WT vs CXCR1KO
	WT	CXCR1KO
	0.159	0.264
	0.168	0.32
	0.225	0.223
	0.194	0.311
mean	0.1865	0.2795
SD	0.0256759	0.0389391
SEM	0.0128379	0.0194695

## Sheet: Fig3D
Comparing ceramide in WT vs CXCR2KO
	WT	CXCR2KO
	5	24
	8.6	35
	7.5	22
	6.3	33
mean	6.85	28.5
SD	1.34257	5.59017
SEM	0.671286	2.79508

[truncated: 10 more sheets: Fig3E, Fig4, Fig6A, Fig6B, Fig7A, Fig7B, Fig7C, Fig8A, Fig8B, Fig8C]
